# Supplementary material for: Characterizing heterogeneity in leukemic cells using single-cell gene expression analysis
Source: PubMed Central journal article supplement (PMC4262970; doi:10.1186/s13059-014-0525-9), 2014-12-03

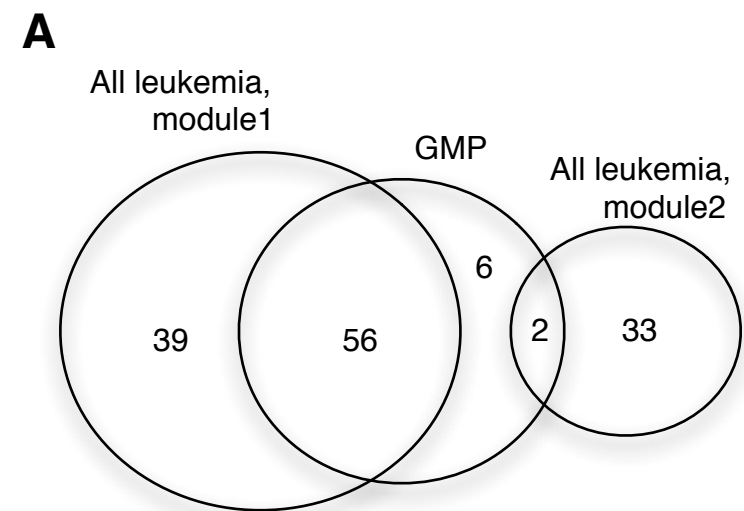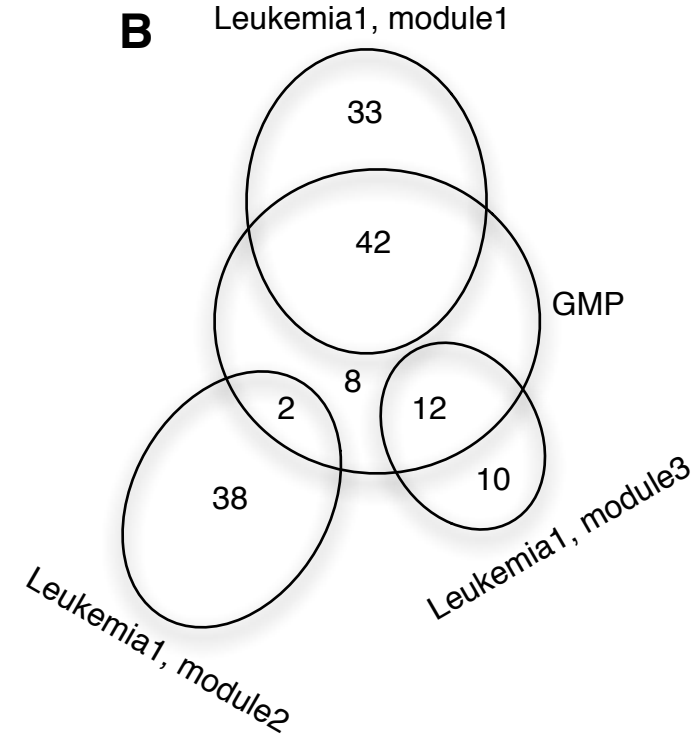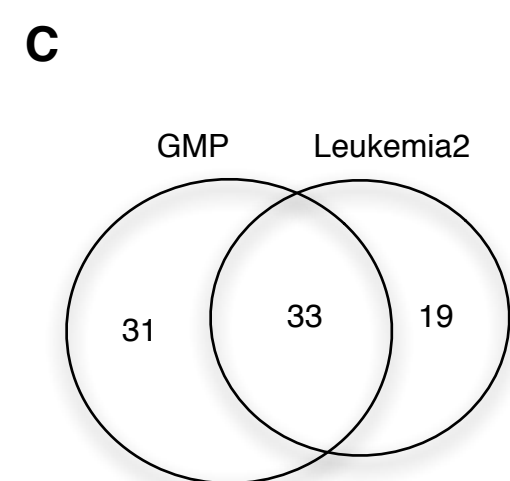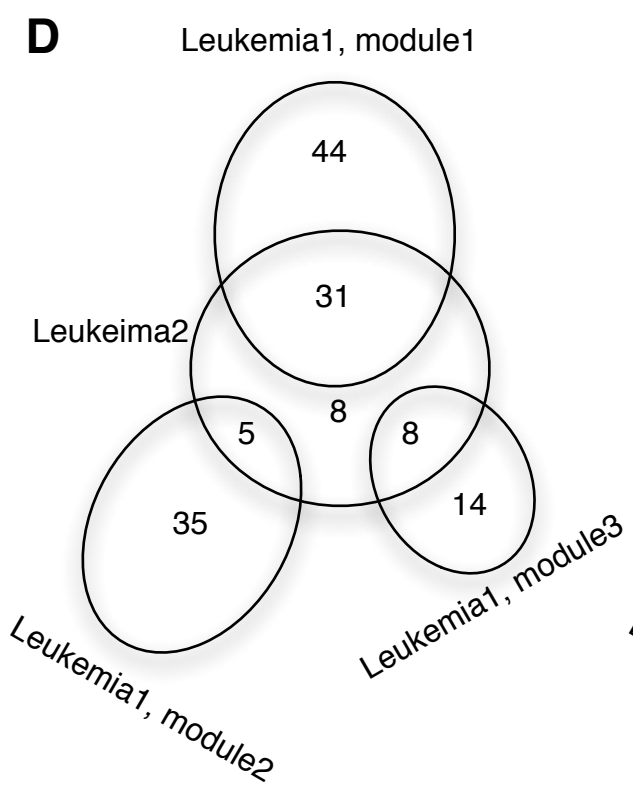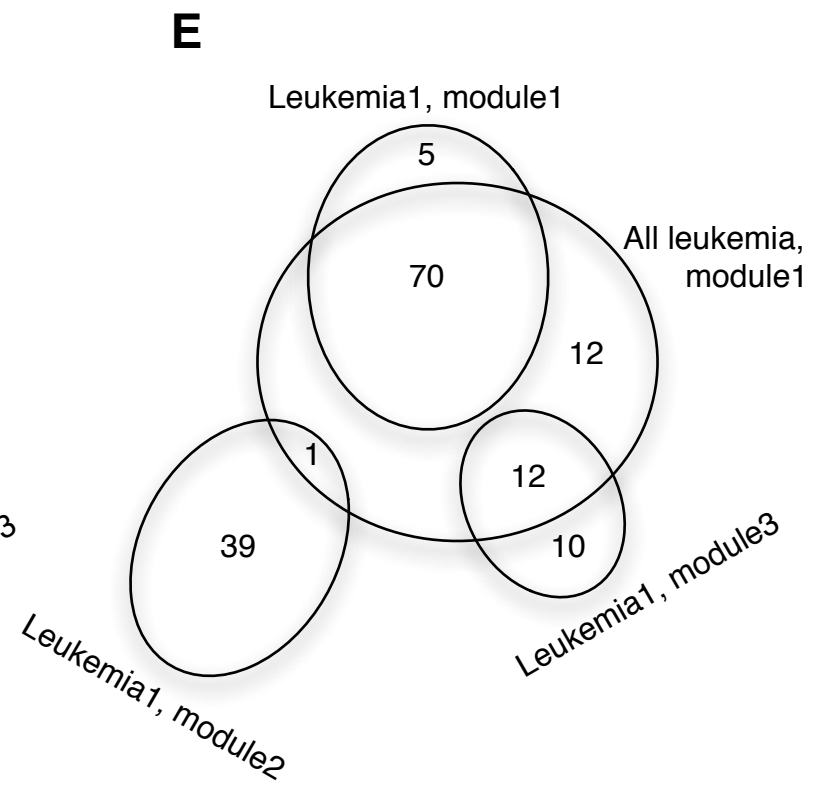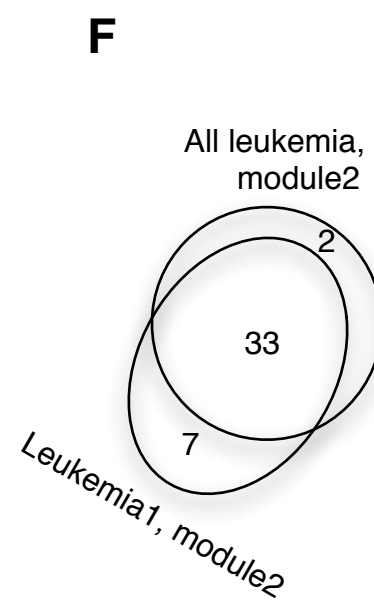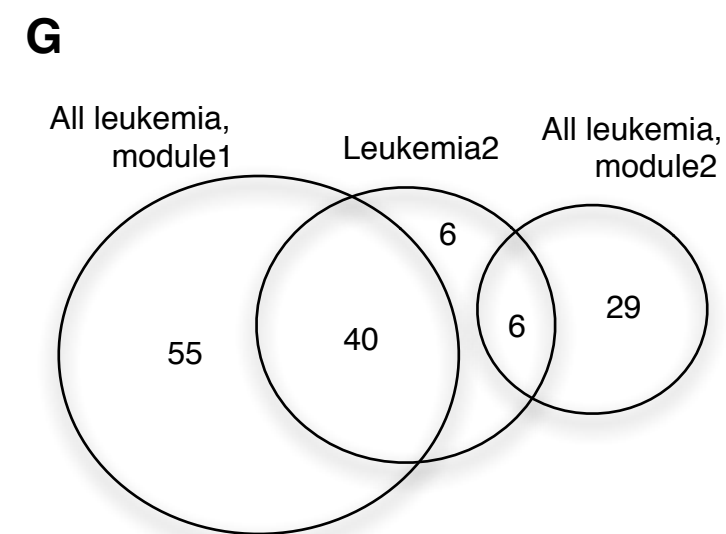

Supplement: 13059_2014_525_MOESM7_ESM.pdf [file 13059_2014_525_MOESM7_ESM.pdf]
